# Supplementary material for: Activating lattice oxygen of single-layer ZnO for the catalytic oxidation reaction
Source: Royal Society of Chemistry journal article supplement (doi:10.1039/d3cp02580b), 2023-01-01
Supplement: d3cp02580b1.pdf [file d3cp02580b1.pdf]

**Supporting information for**  
**Activating Lattice Oxygen of Single-layer ZnO**  
**for Catalytic Oxidation Reaction**

Changping Liu<sup>a,b</sup>, Le Lin<sup>a</sup>, Hao Wu<sup>a</sup>, Yijing Liu<sup>a,b</sup>, Rentao Mu<sup>\*a</sup>, Qiang Fu<sup>\*a</sup>

<sup>a</sup>State Key Laboratory of Catalysis, Dalian Institute of Chemical Physics, Chinese  
Academy of Sciences, Dalian 116023, China

<sup>b</sup>University of Chinese Academy of Sciences, Beijing 100049, China

\*Corresponding authors. E-mail: murt@dicp.ac.cn; qfu@dicp.ac.cn.

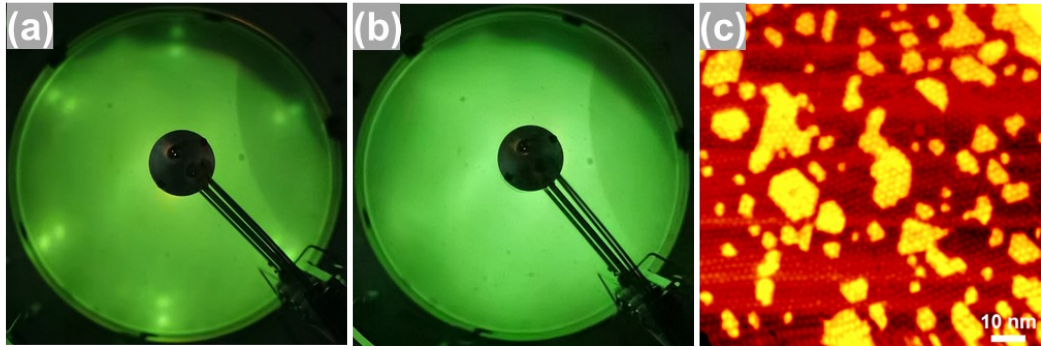

**Fig. S1.** (a) LEED pattern of pristine ZnO/Au(111) surface. (b) LEED pattern of ZnO/Au(111) after exposure to  $1 \times 10^{-6}$  mbar  $O_3$ . (c) STM image of 1.2 monolayer (ML) ZnO/Au(111) surface. Electron energy ( $E_{kin}$ ): (a) 10 eV; (b) 30 eV. Scanning parameter: (c)  $I_t = 0.090$  nA,  $V_s = 1.062$  V.

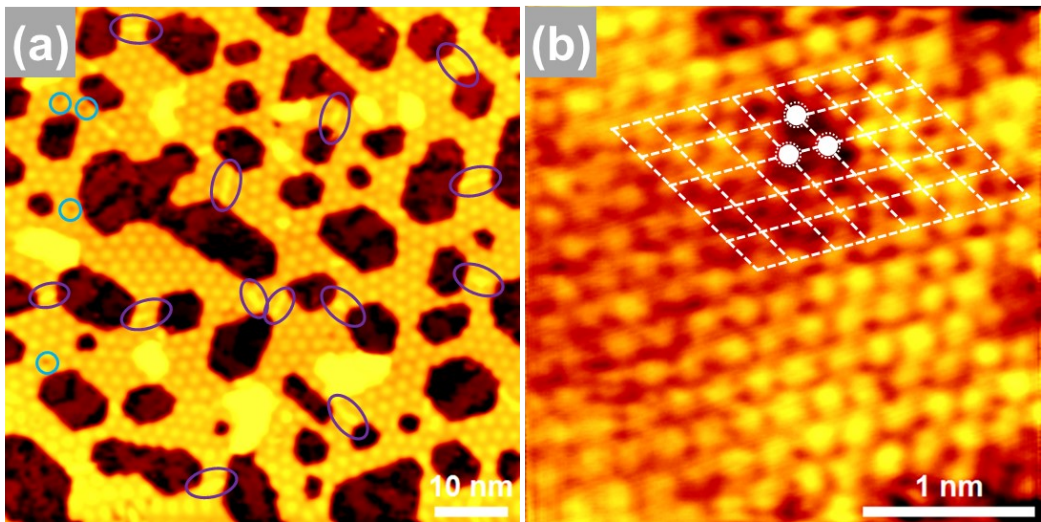

**Fig. S2.** (a) Large scale STM image of 0.6 ML ZnO/Au(111) surface with domain boundaries (purple circles) and defects (blue circles). (b) Atomic resolution STM image of ZnO/Au(111) surface with atomic defects, the white solid circles represent the missing atoms. Scanning parameters: (a)  $I_t = 1.230$  nA,  $V_s = 1.400$  V. (b)  $I_t = 0.200$  nA,  $V_s = 0.085$  V.

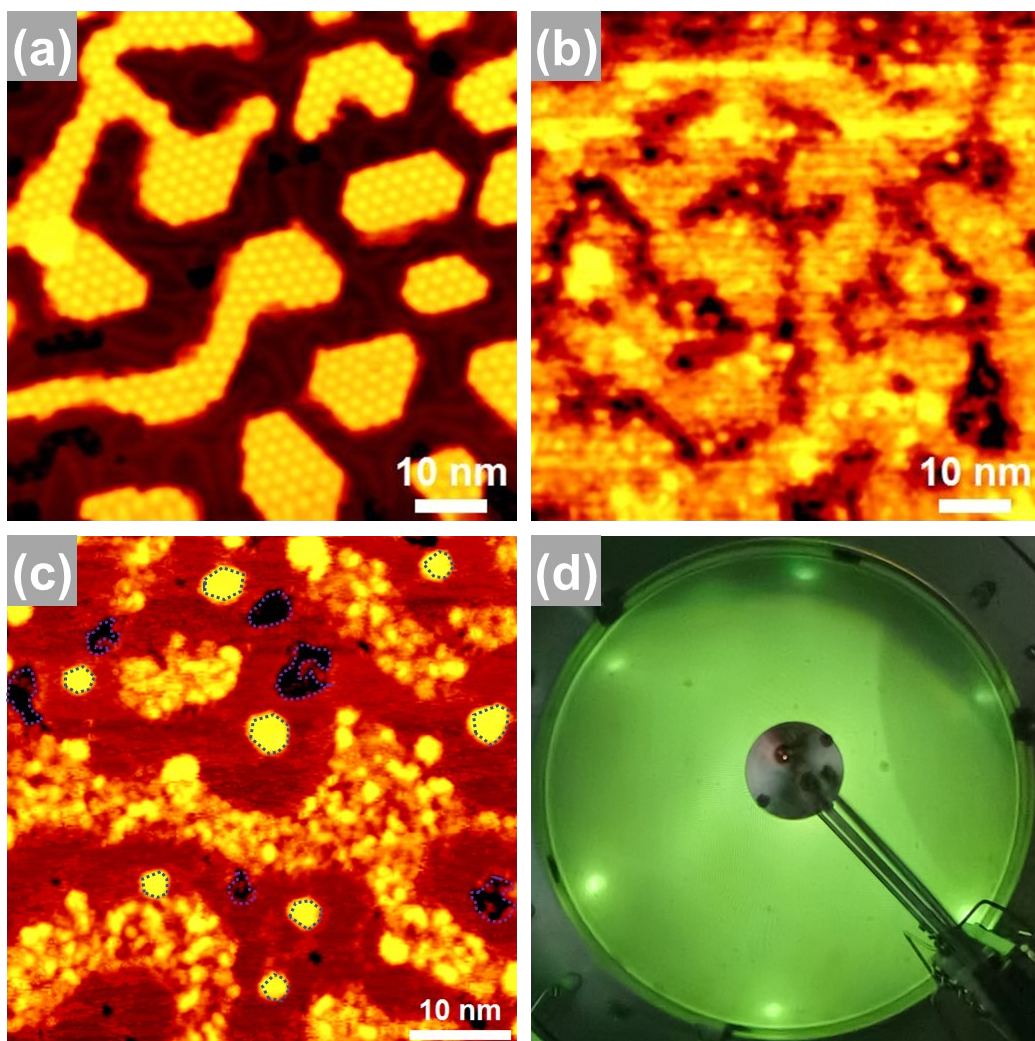

**Fig. S3.** STM images of the (a) 0.4 ML ZnO/ Au(111) and that after exposure to (b)  $1 \times 10^{-6}$  mbar  $O_3$  and subsequent to (c)  $1 \times 10^{-6}$  mbar CO at room temperature (RT). (b) LEED pattern of ZnO/Au(111) after exposure to  $1 \times 10^{-6}$  mbar  $O_3$  for 5 min followed by  $1 \times 10^{-6}$  mbar CO for 10 min. Scanning parameter: (a)  $I_t = 0.100$  nA,  $V_s = 1.201$  V. (b)  $I_t = 0.410$  nA,  $V_s = 1.317$  V. (c)  $I_t = 0.080$  nA,  $V_s = 2.926$  V. Electron energy ( $E_{kin}$ ): (b) 30 eV.

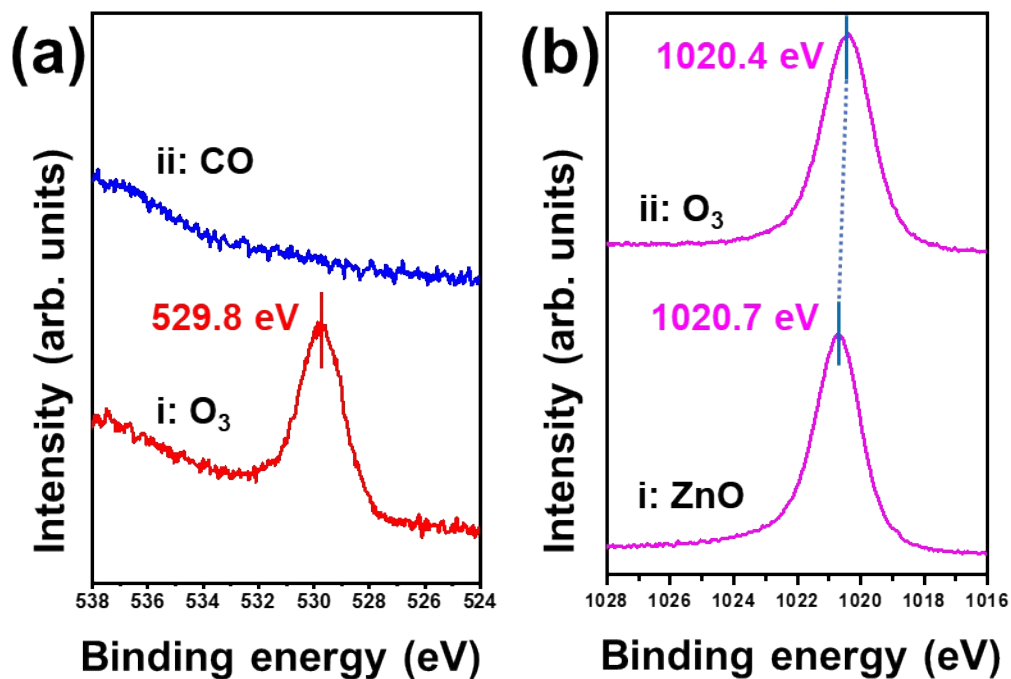

**Fig. S4.** (a) XPS O 1s spectra for Au(111) single crystal after exposure to  $1 \times 10^{-6}$  mbar O<sub>3</sub> and subsequently to  $1 \times 10^{-6}$  mbar CO at RT. (b) XPS Zn 2p<sub>3/2</sub> spectra from 1.2 ML ZnO/Au(111) surfaces before and after exposure to  $1 \times 10^{-6}$  mbar O<sub>3</sub>.

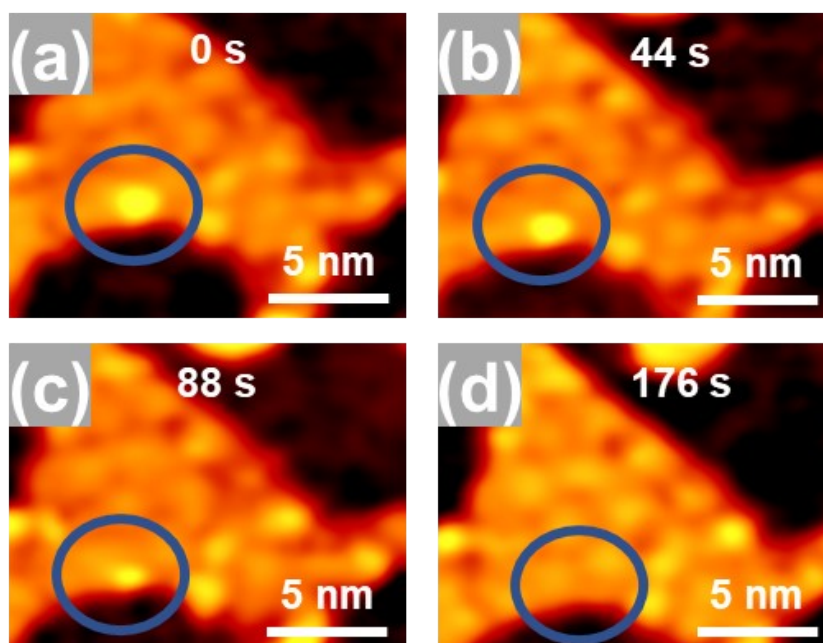

**Fig. S5.** (a) - (d) Sequential in situ STM images of the 0.4 ML ZnO/O/Au(111) surface after exposure to  $\sim 1 \times 10^{-3}$  mbar CO at 300 K. The bright area marked by blue circles indicates the location of intercalated oxygen and disappears after exposure to CO for 176 s. The reaction time is labeled on the top of the STM image. Scanning parameter: (a) - (d)  $I_t = 0.530$  nA,  $V_s = 2.152$  V.

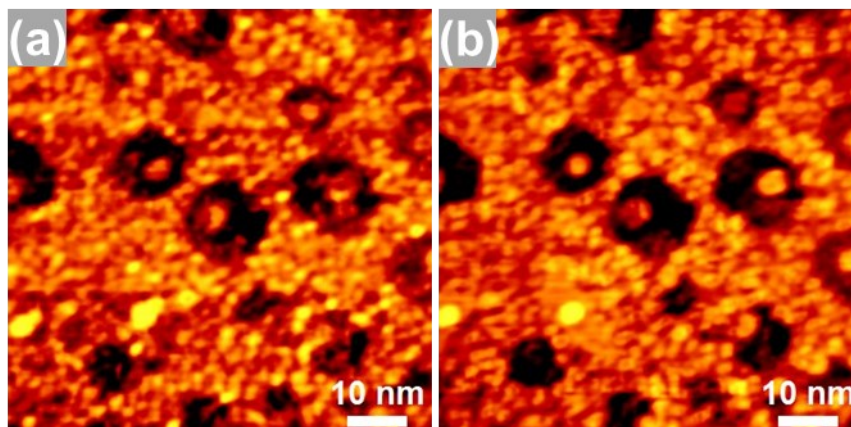

**Fig. S6.** In situ STM images of 0.6 ML ZnO/O/Au(111) (a) before and (b) after exposure to 72.6 mbar H<sub>2</sub>. Scanning parameter: (a) - (b)  $I_t = 0.070$  nA,  $V_s = 0.969$  V.

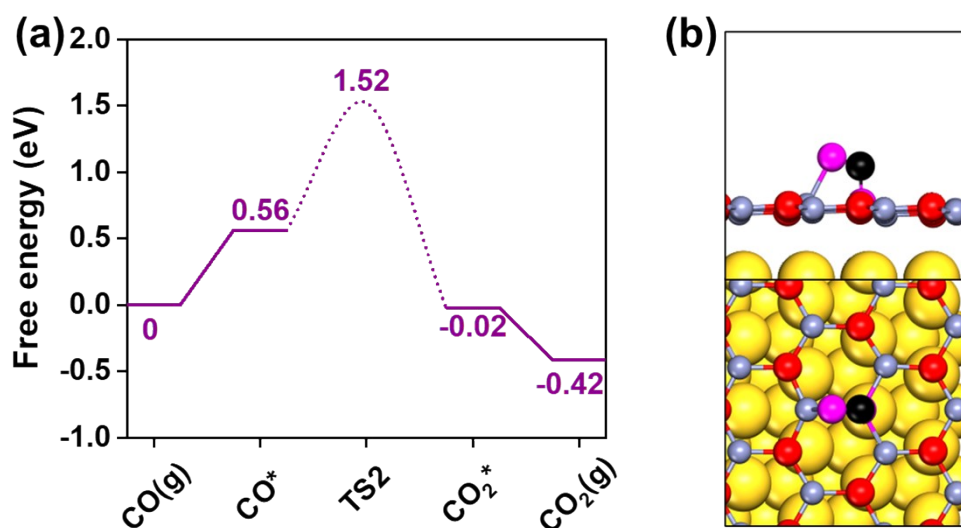

**Fig. S7. COOX over ZnO/Au(111) surface.** (a) Free energy diagram of the COOX process through CO reacting with surface O in ZnO/Au(111). Values are the relative energy levels of each state. (b) Configurations of the transition state (side and top views) corresponding to TS2 in (a). C: black; O: red and pink; Zn: gray; Au: yellow.

**Table S1.** The zero-point energy ( $ZPE$ ), integrated heat capacity ( $\delta H$ ), entropy correction ( $T\Delta S$ ), and total Gibbs free energy correction ( $G-E_{\text{elec}}$ ) at 298 K for the gaseous molecules. (unit: eV)

| Gaseous molecules | $ZPE$ | $\delta H$ | $T\Delta S$ | $G-E_{\text{elec}}$ |
|-------------------|-------|------------|-------------|---------------------|
| CO                | 0.13  | 0.00       | 0.61        | -0.92               |
| CO <sub>2</sub>   | 0.31  | 0.00       | 0.66        | -1.12               |

Note that the partial pressures of gaseous CO and CO<sub>2</sub> are  $3.2 \times 10^{-5}$  and  $1.0 \times 10^{-10}$  mbar in our experiments, respectively.

**Table S2.** The zero-point energy ( $ZPE$ ), integrated heat capacity ( $\delta H$ ), entropy correction ( $T\Delta S$ ), and total Gibbs free energy correction ( $G-E_{\text{elec}}$ ) at 298 K for the adsorbates. (unit: eV)

| Adsorbates              | $ZPE$ | $\delta H$ | $T\Delta S$ | $G-E_{\text{elec}}$ |
|-------------------------|-------|------------|-------------|---------------------|
| O*                      | 0.07  | 0.03       | 0.04        | 0.06                |
| O*+CO*                  | 0.24  | 0.13       | 0.29        | 0.08                |
| CO <sub>2</sub> ‡ (TS2) | 0.25  | 0.09       | 0.16        | 0.18                |
| CO <sub>2</sub> *       | 0.29  | 0.09       | 0.17        | 0.21                |
